# Supplementary material for: A Comparison of Magnetic Resonance Imaging Methods to Assess Multiple Sclerosis Lesions: Implications for Patient Characterization and Clinical Trial Design
Source: MDPI journal article supplement (doi:10.3390/diagnostics12010077), 2021-12-30
Supplement: s1 [file s1]

## Supplementary Material

**Table S1:** Subject demographics: TP = Time point; EDSS = Expanded Disability Status Scale. Note, the number of QSM+ lesions changed (from 12 to 14) for case 10, no others changed.

| ID | Age | Sex | EDSS TP1 | EDSS TP2 | EDSS change | # QSM+ lesions | Medications          |
|----|-----|-----|----------|----------|-------------|----------------|----------------------|
| 1  | 35  | F   | 2.5      | 3        | 0.5         | 61             | Tysabri              |
| 2  | 30  | F   | 0        | 1.5      | 1.5         | 19             | Tecfidera            |
| 3  | 24  | F   | 1        | 1.5      | 0.5         | 25             | Gilenya              |
| 4  | 35  | F   | 2        | 2        | 0           | 7              | Amantadine, Baclofen |
| 5  | 38  | F   | 1        | 1.5      | 0.5         | 35             | Tecfidera            |
| 7  | 35  | M   | 1        | 1        | 0           | 12/14          | Copaxone             |
| 8  | 51  | F   | 3        | 3        | 0           | 29             | Copaxone             |
| 9  | 39  | F   | 1        | 1        | 0           | 0              | Rebif                |
| 10 | 37  | M   | 0        | 1.5      | 1.5         | 46             | Tecfidera            |
| 11 | 35  | F   | 2.5      | 2.5      | 0           | 24             | Gilenya              |
| 12 | 26  | F   | 0        | 1        | 1           | 4              | Cell cept            |
| 13 | 31  | F   | 1.5      | 1.5      | 0           | 10             | Tecfidera            |
| 14 | 55  | F   | 3        | 3        | 0           | 0              | Gabapentin           |
| 15 | 54  | F   | 4        | 3.5      | -0.5        | 5              | Copaxone             |
| 16 | 36  | F   | 2        | 2        | 0           | 33             | Tecfidera            |
| 17 | 48  | M   | 2        | 3.5      | 1.5         | 33             | Tecfidera            |
| 18 | 37  | F   | 1        | 2        | 1           | 6              | Copaxone             |
| 19 | 37  | M   | 1.5      | 2.5      | 1           | 19             | -                    |
| 20 | 39  | M   | 6        | 6        | 0           | 6              | Tysabri              |
| 21 | 33  | F   | 1.5      | 3        | 1.5         | 6              | Copaxone             |

**Table S2:** Imaging parameters for the MRI protocol

| Sequence Name    | Low FA SWI | High FA SWI | T2 FLAIR | T2 TSE | MTC   | Pre/post T1 MP RAGE | MWF       | DTI   |
|------------------|------------|-------------|----------|--------|-------|---------------------|-----------|-------|
| Orientation      | Axial      | Axial       | Axial    | Axial  | Axial | Axial               | Axial     | Axial |
| Acquisition type | 3D         | 3D          | 3D       | 2D     | 3D    | 3D                  | 3D        | 2D    |
| TR (ms)          | 25         | 25          | 6000     | 5100   | 37    | 1680                | 650       | 8400  |
| TE (ms)          | 7.5, 17.5  | 8.75, 18.75 | 397      | 80     | 11    | 3.61                | 18 echoes | 107   |
| TI (ms)          | N/A        | N/A         | 2200     | N/A    | N/A   | 900                 | N/A       | N/A   |
| FA (degree)      | 6          | 24          | N/A      | 120    | 15    | 9                   | 90        | N/A   |

|                                              |                   |                   |                    |                   |                   |                 |                  |                    |
|----------------------------------------------|-------------------|-------------------|--------------------|-------------------|-------------------|-----------------|------------------|--------------------|
| <b>Base Resolution</b>                       | 384               | 384               | 256                | 384               | 384               | 512             | 160              | 96                 |
| <b>FOV phase (%)</b>                         | 75%               | 75%               | 100%               | 75%               | 100%              | 100             | 75%              | 100%               |
| <b>Matrix size</b>                           | 144 x<br>384      | 144 x<br>384      | 256 x 256          | 144 x<br>384      | 144 x<br>384      | 256 x<br>512    | 192 x<br>256     | 96 x 96            |
| <b>FOVphase x<br/>FOVread</b>                | 192 x<br>256      | 192 x<br>256      | 192 x 256          | 192 x<br>256      | 192 x<br>256      | 256 x<br>256    | 120x<br>160      | 256 x 256          |
| <b>Slice Gap %</b>                           | -                 | -                 | N/A                | 0%                | 20%               | 0%              | 50%              | 0                  |
| <b>TH (mm)</b>                               | 2.0               | 2.0               | 1.34               | 2                 | 2.7               | 1               | 5                | 2.7                |
| <b>No of Slices</b>                          | 80                | 80                | 80                 | 80                | 80                | 160             | 24               | 56                 |
| <b>Voxel size<br/>(mm<sup>3</sup>)</b>       | 1.33x0.<br>67x2.0 | 1.33x0.<br>67x2.0 | 1.33x0.67<br>x1.34 | 1.33x0.6<br>7x2.7 | 1.33x0.<br>67x2.7 | 1.0x0.5<br>x1.0 | 1.6 x<br>1.6 x 5 | 2.7 x 2.7 x<br>2.7 |
| <b>Interpolation</b>                         | OFF               | OFF               | ON                 | OFF               | OFF               | OFF             | OFF              | OFF                |
| <b>#DTI dir</b>                              | N/A               | N/A               | N/A                | N/A               | N/A               | N/A             | N/A              | 30                 |
| <b>measurements</b>                          | 1                 | 1                 | 1                  | 1                 | 1                 | 1               | 1                | N/A                |
| <b>Concatenations</b>                        | 1                 | 1                 | 1                  | 3                 | 1                 | 1               | 1                | 1                  |
| <b># Acq/averages</b>                        | 1                 | 1                 | 1                  | 1                 | 1                 | 1               | 1                | 1                  |
| <b>Fat Suppr</b>                             | None              | None              | None               | None              | None              | None            | Fat Sat          | Fat Sat            |
| <b>Water Suppr</b>                           | None              | None              | None               | None              | None              | None            | N/A              | N/A                |
| <b>Phase resolution</b>                      | 50%               | 50%               | 50%                | 50%               | 50%               | 50%             | 100%             | 100                |
| <b>Slice Resolution</b>                      | 100%              | 100%              | 100%               | N/A               | 100%              | 75%             | 100%             | N/A                |
| <b>Slice Over-sampling</b>                   | 10%               | 10%               | 0                  | N/A               | 0%                | 0%              | 0%               | N/A                |
| <b>Phase Over-sampling</b>                   | 0.00%             | 0.00%             | 100%               | 0%                | 0%                | 0%              | 0%               | 0                  |
| <b>Phase Enc. Dir</b>                        | R>>L              | R>>L              | R>>L               | R>>L              | R>>L              | A>>P            | R>>L             | A>>P               |
| <b>Accel. factor<br/>PE2</b>                 | 1                 | 1                 | 1                  | N/A               | N/A               | 1               | N/A              | N/A                |
| <b>Accel. factor PE</b>                      | 2                 | 2                 | 2                  | 2                 | 2                 | 2               | N/A              | 2                  |
| <b>Partial Fourier<br/>(phase)</b>           | OFF               | OFF               | 7/8                | OFF               | OFF               | OFF             | OFF              | OFF                |
| <b>Partial Fourier<br/>(Slice)</b>           | OFF               | OFF               | 7/8                | OFF               | OFF               | OFF             | 3/4              | N/A                |
| <b>Ref. lines PE</b>                         | 24                | 24                | 24                 | 35                | 24                | 24              | N/A              | 40                 |
| <b>BW (Hz/Px)</b>                            | 270               | 270               | 781                | 221               | 70                | 180             | 976              | 1860               |
| <b>Flow Comp</b>                             | yes               | yes               | no                 | no                | no                | slice           | N/A              | N/A                |
| <b>Echo train per<br/>slice</b>              | N/A               | N/A               | 1                  | 5                 | N/A               | N/A             | N/A              | N/A                |
| <b>b - Value s/mm<sup>2</sup></b>            | N/A               | N/A               | N/A                | N/A               | N/A               | N/A             | N/A              | 0, 1000,<br>2000   |
| <b>Slice<br/>Turbo/Turbo/<br/>EPI Factor</b> | N/A               | N/A               | 2, 141,<br>N/A     | N/A, 18,<br>N/A   | N/A               | N/A             | N/A,<br>N/A,3    | N/A,<br>N/A, 80    |
| <b>Scanner Acquisition Time<br/>(sec)</b>    | 3:04              | 3:04              | 5:14               | 3:09              | 5:13              | 3:55            | 7:48             | 9:02               |

**Table S3:** Quantitative susceptibility map (QSM) positive and negative lesions and normal appearing white matter (NAWM) results. TP: represents time point.

| Lesions       |                                       |     |             |      |         |      |         |
|---------------|---------------------------------------|-----|-------------|------|---------|------|---------|
| Sequences     | QSM positive (18 subjects)            |     |             |      |         |      |         |
|               | Mean lesion volume (mm <sup>3</sup> ) |     | Mean Signal |      | Mean SD |      | Z-score |
|               | TP1                                   | TP2 | TP1         | TP2  | TP1     | TP2  |         |
| T2 FLAIR      | 553                                   | 474 | 215         | 216  | 18      | 18   | -0.54   |
| T2            | 422                                   | 431 | 853         | 861  | 115     | 116  | -0.70   |
| MTR           | 302                                   | 310 | 0.32        | 0.32 | 0.03    | 0.03 | -0.10   |
| QSM           | 213                                   | 193 | 18          | 18   | 14      | 13   | 0.10    |
| FA            | 239                                   | 238 | 0.35        | 0.35 | 0.09    | 0.09 | -0.04   |
| ADC           | 273                                   | 266 | 0.93        | 0.96 | 0.14    | 0.15 | -0.40   |
| RD            | 272                                   | 267 | 0.58        | 0.59 | 0.12    | 0.12 | -0.18   |
| MWF           | 247                                   | 231 | 8.26        | 8.66 | 3.67    | 3.63 | -0.24   |
| STAGE T1MAP   | 380                                   | 400 | 1431        | 1427 | 307     | 299  | 0.15    |
| STAGE PSDMAP  | 379                                   | 401 | 2482        | 2496 | 213     | 228  | -0.63   |
| Sequences     | QSM negative (11 subjects)            |     |             |      |         |      |         |
|               | Mean lesion volume (mm <sup>3</sup> ) |     | Mean signal |      | Mean SD |      | Z-score |
|               | TP1                                   | TP2 | TP1         | TP2  | TP1     | TP2  |         |
| T2 FLAIR      | 478                                   | 433 | 206         | 212  | 25      | 26   | -0.40   |
| T2            | 452                                   | 417 | 788         | 801  | 91      | 100  | -1.39   |
| MTR           | 274                                   | 273 | 0.35        | 0.34 | 23      | 24   | 0.40    |
| QSM           | 365                                   | 347 | -9          | -9   | 12      | 12   | 0.10    |
| FA            | 252                                   | 238 | 0.34        | 0.32 | 0.09    | 0.09 | 0.41    |
| ADC           | 259                                   | 241 | 0.90        | 0.94 | 0.15    | 0.14 | -0.46   |
| RD            | 260                                   | 241 | 0.55        | 0.57 | 0.11    | 0.11 | -0.38   |
| MWF           | 374                                   | 362 | 10.65       | 9.96 | 3.59    | 3.21 | 0.54    |
| STAGE T1 Map  | 394                                   | 369 | 1336        | 1367 | 229     | 244  | -1.29   |
| STAGE PSD Map | 394                                   | 369 | 2490        | 2501 | 188     | 195  | -0.56   |
| NAWM          |                                       |     |             |      |         |      |         |
| Sequences     | MS (contralateral to lesions)         |     |             |      |         |      |         |
|               | Mean Vol. of ROI (mm <sup>3</sup> )   |     | Mean signal |      | Mean SD |      | Z-score |
|               | TP1                                   | TP2 | TP1         | TP2  | TP1     | TP2  |         |
| T2 FLAIR      | 268                                   | 305 | 159         | 154  | 9       | 9    | 1.14    |
| T2            | 289                                   | 313 | 548         | 545  | 39      | 37   | 0.56    |

|                      |                                                    |            |                    |            |                |            |                |
|----------------------|----------------------------------------------------|------------|--------------------|------------|----------------|------------|----------------|
| <b>MTR</b>           | 265                                                | 253        | 0.41               | 0.41       | 0.01           | 0.01       | -0.01          |
| <b>QSM</b>           | 169                                                | 157        | -7                 | -6         | 9              | 9          | 0.08           |
| <b>FA</b>            | 186                                                | 177        | 0.62               | 0.63       | 0.10           | 0.10       | -0.25          |
| <b>ADC</b>           | 204                                                | 190        | 0.68               | 0.70       | 0.09           | 0.09       | -0.37          |
| <b>RD</b>            | 204                                                | 190        | 0.34               | 0.33       | 0.07           | 0.07       | 0.26           |
| <b>MWF</b>           | 221                                                | 205        | 14.77              | 15.77      | 3.61           | 3.74       | -0.55          |
| <b>STAGE T1 Map</b>  | 262                                                | 293        | 940                | 940        | 100            | 90         | 0.02           |
| <b>STAGE PSD Map</b> | 262                                                | 293        | 2077               | 2082       | 98             | 99         | -0.45          |
| <b>Sequences</b>     | <b>HC (drawn across 4 different brain regions)</b> |            |                    |            |                |            |                |
|                      | <b>Mean Vol. of ROI (mm<sup>3</sup>)</b>           |            | <b>Mean signal</b> |            | <b>Mean SD</b> |            | <b>Z-score</b> |
|                      | <b>TP1</b>                                         | <b>TP2</b> | <b>TP1</b>         | <b>TP2</b> | <b>TP1</b>     | <b>TP2</b> |                |
| <b>T2 FLAIR</b>      | 679                                                | 723        | 152                | 151        | 15             | 16         | 0.93           |
| <b>T2</b>            | 679                                                | 723        | 502                | 505        | 50             | 47         | -1.04          |
| <b>MTR</b>           | 386                                                | 420        | 0.40               | 0.41       | 0.02           | 0.02       | 0.00           |
| <b>QSM</b>           | 368                                                | 406        | -8                 | -8         | 8              | 9          | 0.19           |
| <b>FA</b>            | 145                                                | 193        | 0.57               | 0.57       | 0.15           | 0.14       | -0.27          |
| <b>ADC</b>           | 145                                                | 193        | 0.69               | 0.68       | 0.10           | 0.12       | 0.59           |
| <b>RD</b>            | 145                                                | 193        | 0.34               | 0.33       | 0.09           | 0.08       | 0.60           |
| <b>MWF</b>           | 325                                                | 294        | 15.94              | 17.64      | 4.33           | 4.13       | -3.57          |
| <b>STAGE T1 Map</b>  | 622                                                | 654        | 998                | 1003       | 126            | 117        | -0.45          |
| <b>STAGE PSD Map</b> | 622                                                | 654        | 2199               | 2115       | 109            | 84         | 0.83           |
